# Supplementary material for: The relationship between disease-specific psychosocial stressors and depressive symptoms in Huntington’s disease
Source: PubMed Central journal article supplement (PMC10769991; doi:10.1007/s00415-023-11982-x), 2023-09-11
Supplement: 415_2023_11982_MOESM1_ESM.pdf [file 415_2023_11982_MOESM1_ESM.pdf]

## Supplementary Figure 1

### Scatterplots for Associations Between Each Psychosocial Stressor and Depression Severity

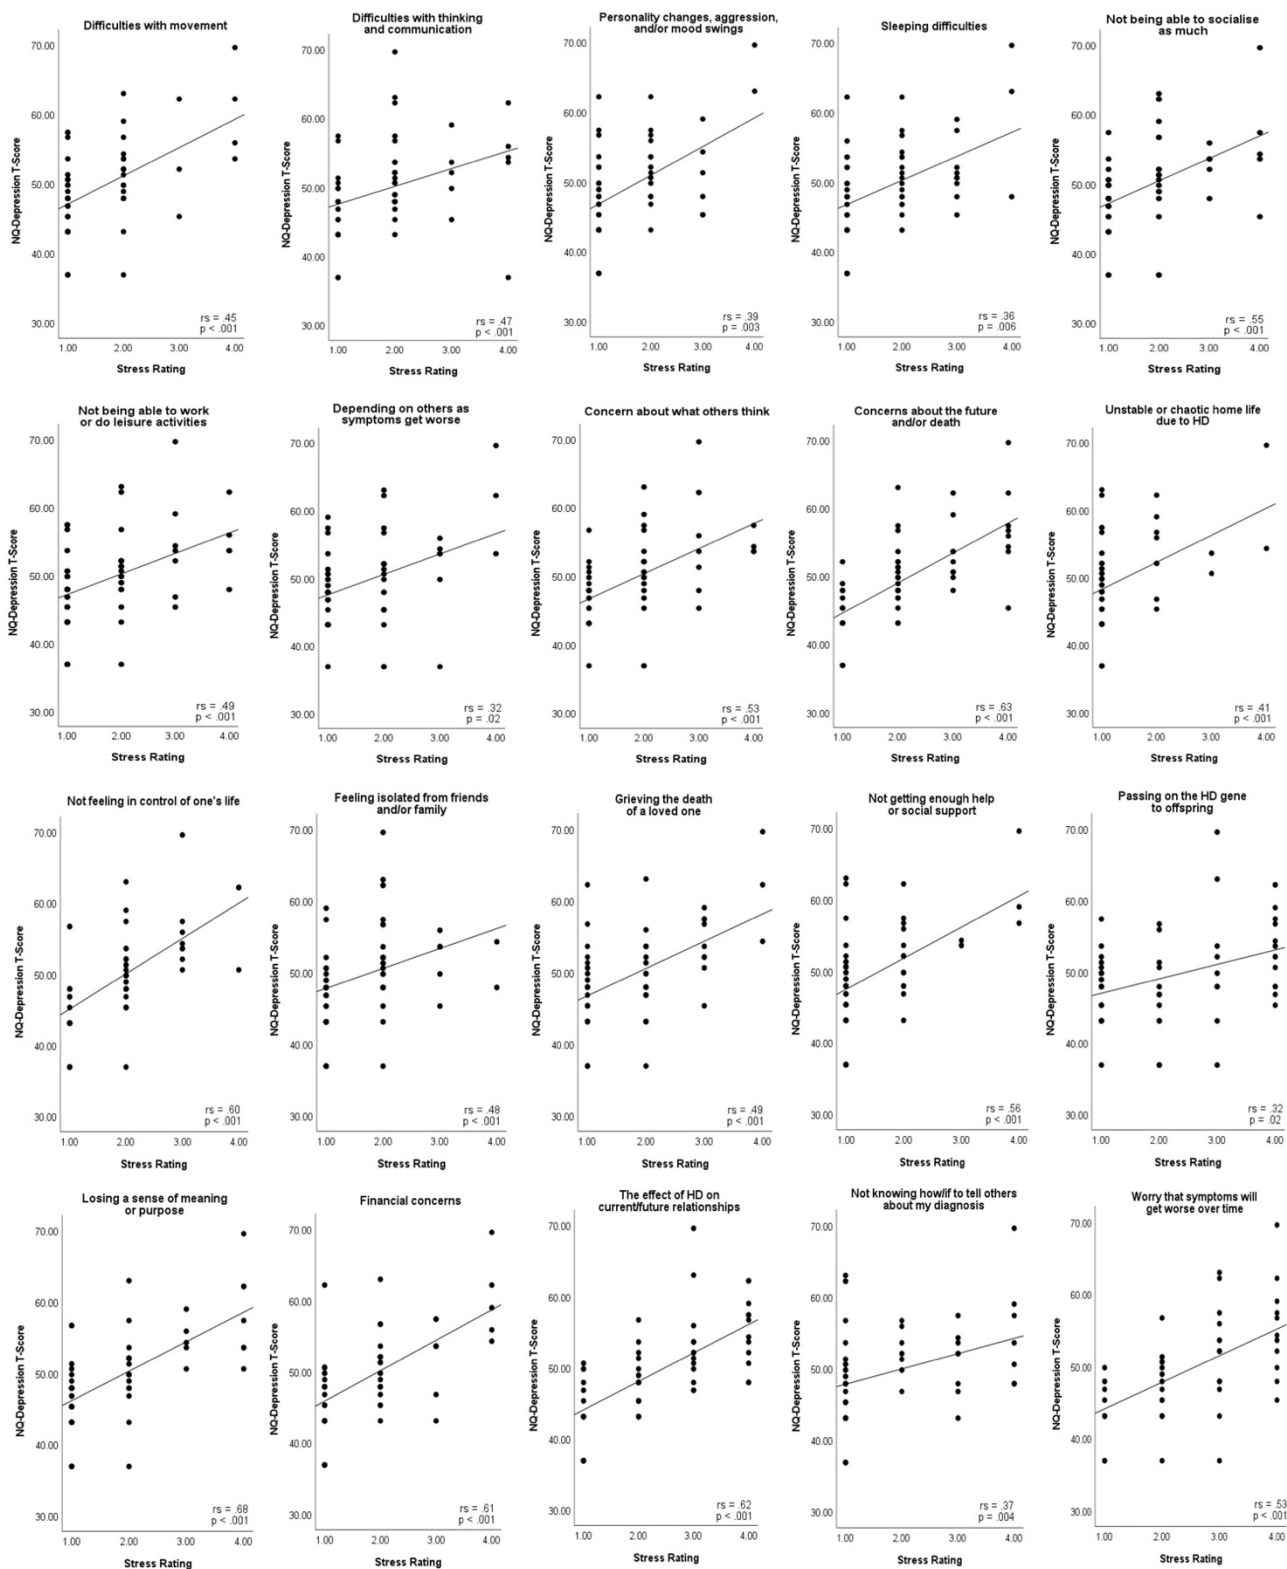

**Note.** rs = Spearman's rho.

Significance threshold following Bonferroni correction for 20 comparisons =  $p < .0025$ .

**Article Title:** The Relationship Between Disease-Specific Psychosocial Stressors and Depressive Symptoms in Huntington's Disease

**Journal Name:** Journal of Neurology

**Author Names:** Hiba Bilal, Ian H. Harding, Julie C. Stout

**Corresponding Author:** Professor Julie Stout, Turner Institute for Brain and Mental Health, 18 Innovation Walk, Monash University, Clayton, 3800, Victoria, Australia. Tel: +61 3 9905 3987;  
Email: [julie.stout@monash.edu](mailto:julie.stout@monash.edu)
